# Supplementary material
Source: MDPI journal article supplement (https://www.mdpi.com/2073-4352/7/3/70)
Supplement: s1 [file s1]

**SUPPLEMENTARY MATERIAL**

**Figure S1.** Chemical structures of amino-compounds used in the diazotation reaction of sulphonated polystyrene films.

| Amino-compound              | Structure                                                                            |
|-----------------------------|--------------------------------------------------------------------------------------|
| Aniline                     | 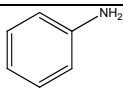   |
| 2-Chloroaniline             |    |
| 4-Hexadecylaniline          |   |
| 4-Dodecylaniline            |  |
| o-Anisidine                 |  |
| 6-Chloro-2,4-Dinitroaniline |  |
| 4-Amino-N,N-Dimethylaniline |  |

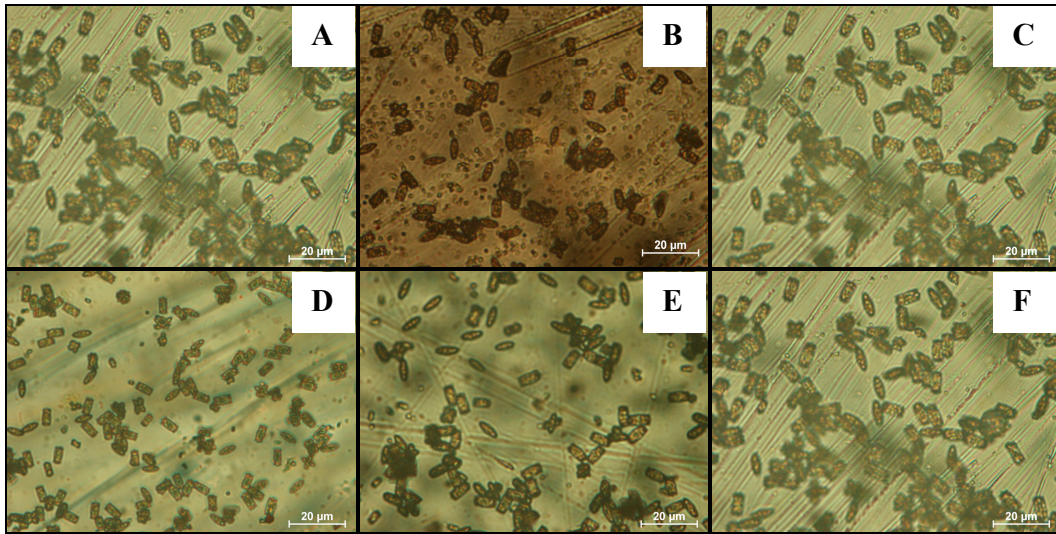

**Figure S2.** Optical images of CaOx crystals grown in polystyrene films sulphonated and diazotated with: aniline (A), 2-chloroaniline (B), 4-hexadecyl aniline (C), 4-dodecyl aniline (D), o-anisidine (E), and 6-chloro-2,4-dinitro aniline (F).

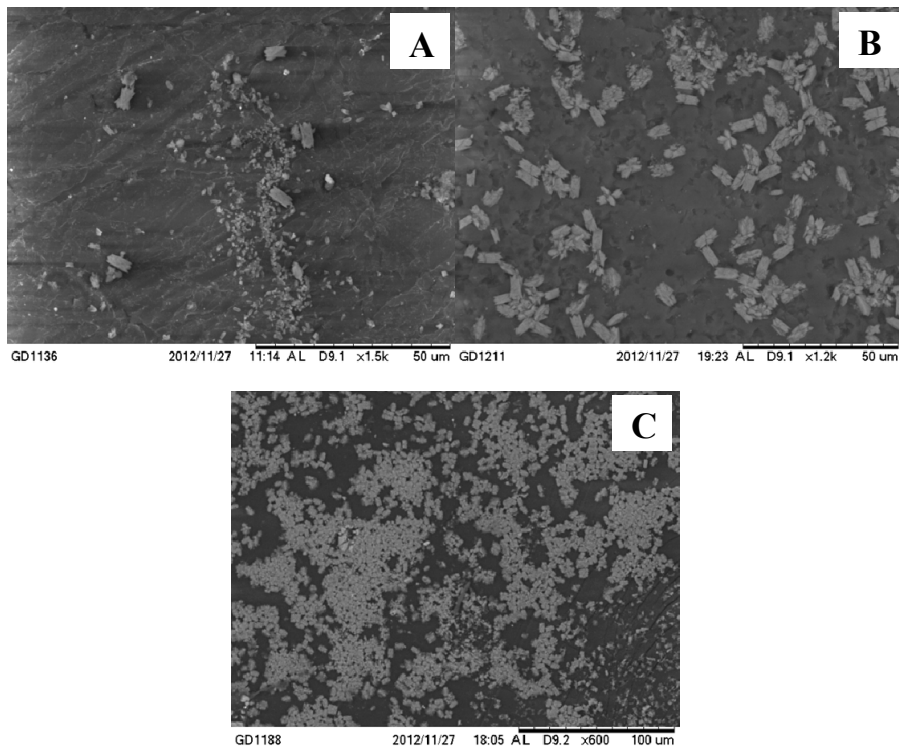

**Figure S3.** SEM images of CaOx crystals grown in polystyrene films sulphonated and diazotated with: aniline (A), 2-trifluoromethyl aniline (B) and 4-nitroaniline (C).

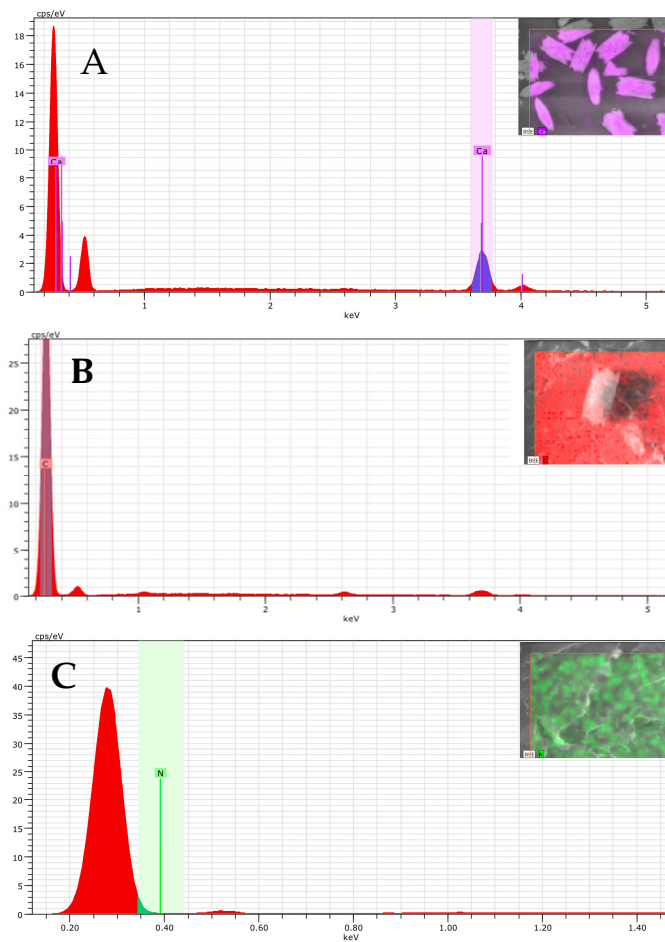

**Figure S4.** SEM-EDS of CaOx crystals grown on sulphonated polystyrene films diazotated with: 2-trifluoromethyl aniline (A), and with aniline (B and C).
